# Supplementary material
Source: publisher figshare collection journal article supplement (https://tandf.figshare.com/ndownloader/files/43724643)
Supplement: Supplementary file 1 [file 43724643]

**ABOUT THE AUTHORS**

Yeshiwas Abunie is a lecturer of tourism and heritage management at University of Gondar and a Ph.D. candidate in social anthropology at University of Gondar. He has more than 12 years of teaching, research, and community service experience at public universities in Ethiopia. His research interests also include aspects related to tourism and heritage issues, such as social and cultural anthropology, history, heritage tourism, sustainable tourism, natural and cultural heritage conservation, and museum studies. Endalkachew Teshome is an associate professor (Ph.D.) of ecotourism and wildlife management at University of Gondar. His research has focused on wildlife conservation, tourism, sustainable tourism, tourism management, wildlife ecology, conservation, and other related issues. Mesfin Dessiye is an associate professor (Ph.D.) of social anthropology at University of Gondar. His interests in research have included social and cultural anthropology, gender and development, and the lived experiences of women incarcerated, among other related topics.
